# Supplementary material for: BCR-ABL1 Doubling-Times and Halving-Times May Predict CML Response to Tyrosine Kinase Inhibitors
Source: PubMed Central journal article supplement (PMC6700306; doi:10.3389/fonc.2019.00764), 2019-08-13
Supplement: Table_1.pdf [file Table_1.pdf]

**Supplementary Table 1. Patient Characteristics (N = 529)**

| <b>Characteristics</b>                            |                          |          |
|---------------------------------------------------|--------------------------|----------|
| <b>Age</b>                                        | <b>years</b>             |          |
| Median                                            | 55.4                     |          |
| Range                                             | 17-90                    |          |
| <b>Sex Distribution</b>                           | <b>n°</b>                | <b>%</b> |
| Male                                              | 272                      | 51.4     |
| Female                                            | 257                      | 48.6     |
| <b>Hb</b>                                         | <b>g/dl</b>              |          |
| Median                                            | 12.1                     |          |
| Range                                             | 6.8-16                   |          |
| <b>WBC</b>                                        | <b>*10<sup>9</sup>/L</b> |          |
| Median                                            | 99.8                     |          |
| Range                                             | 24.6-500                 |          |
| <b>PLT</b>                                        | <b>*10<sup>9</sup>/L</b> |          |
| Median                                            | 426.6                    |          |
| Range                                             | 46-664                   |          |
| <b>Splenomegaly</b>                               | <b>cm</b>                |          |
| Median                                            | 3.1                      |          |
| Range                                             | 0-30                     |          |
| <b>Additional Chromosomal Abnormalities (ACA)</b> | 41 (n°)                  | 7.7 (%)  |

|                        |           |          |
|------------------------|-----------|----------|
| <b>Sokal risk</b>      | <b>n°</b> | <b>%</b> |
| Low/Int                | 444       | 83.9     |
| High                   | 85        | 16.1     |
| <b>ELTS risk group</b> | <b>n°</b> | <b>%</b> |
| Low/Int                | 500       | 92.6     |
| High                   | 29        | 7.4      |
| <b>Transcript Type</b> | <b>n°</b> | <b>%</b> |
| e13a2                  | 229       | 43.2     |
| e14a2                  | 252       | 47.6     |
| e13a2 and e14a2        | 48        | 9.2      |
